# Supplementary material for: USP7 is a SUMO deubiquitinase essential for DNA replication
Source: Springer Nature journal article supplement (doi:10.1038/nsmb.3185), 2016-03-07
Supplement: 41594_2016_BFnsmb3185_MOESM37_ESM.pdf [file 41594_2016_BFnsmb3185_MOESM37_ESM.pdf]

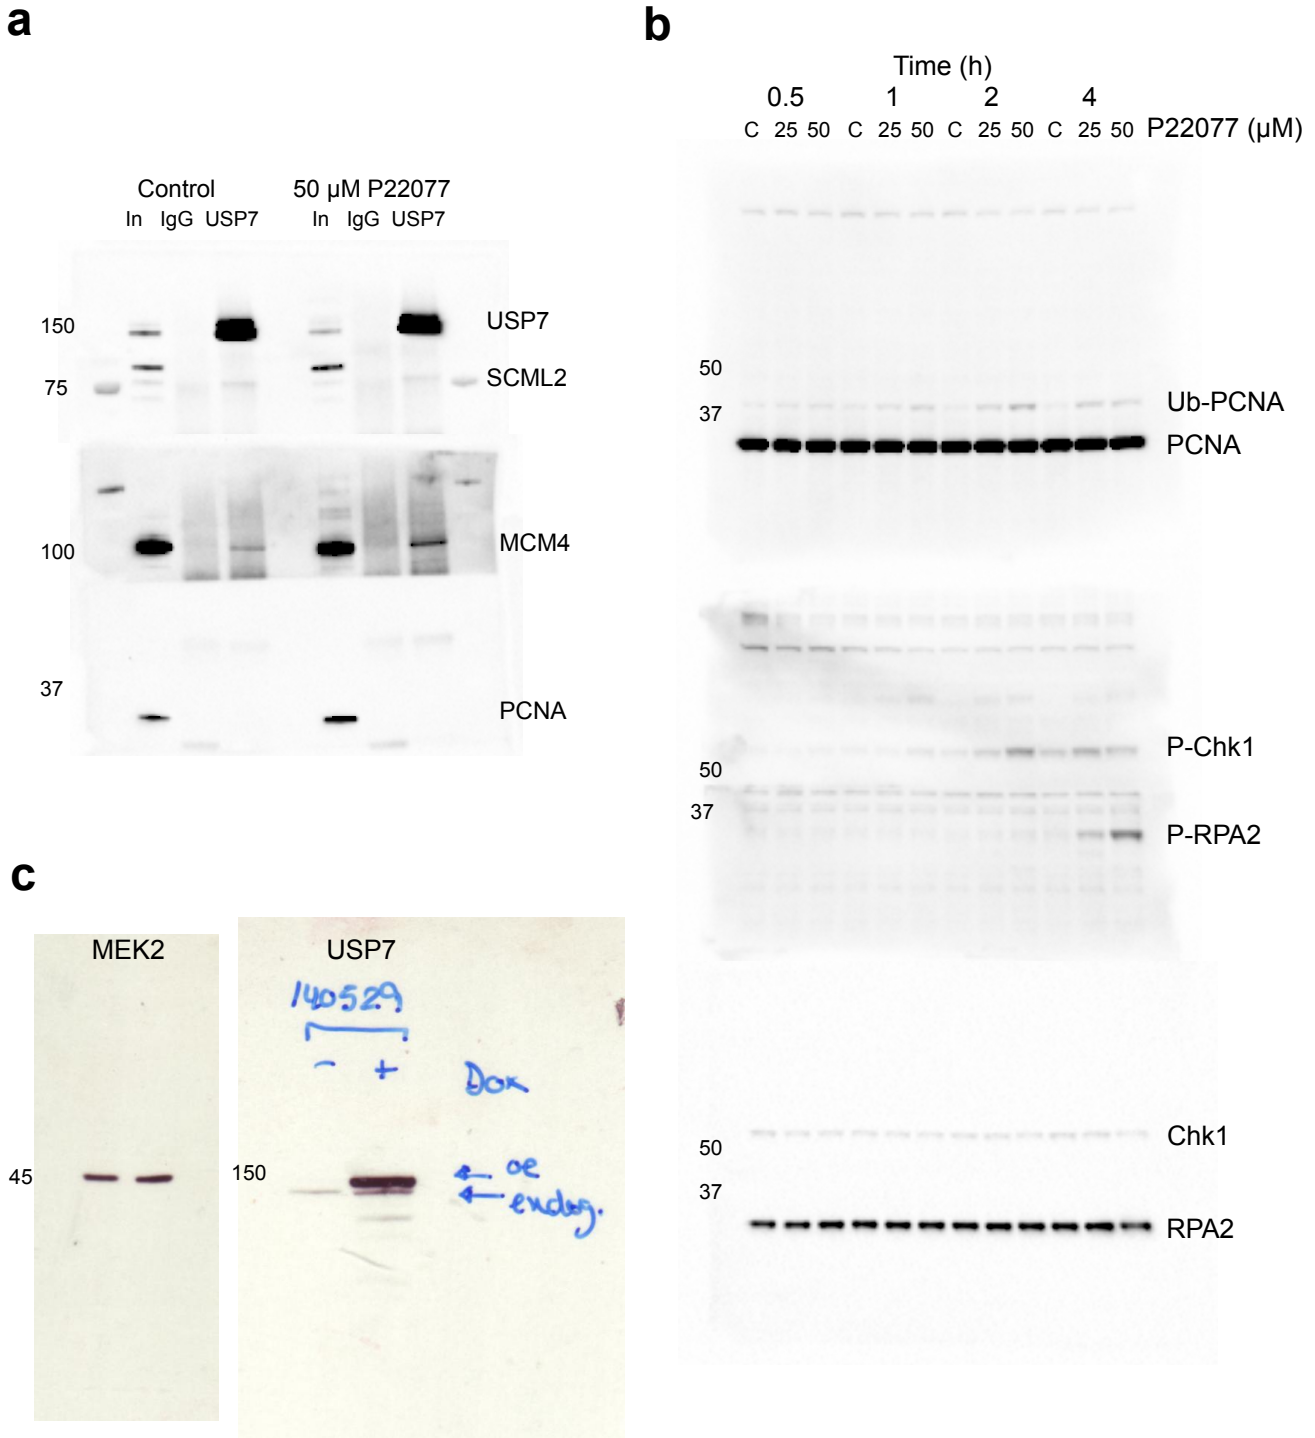

(a) Uncropped images for Figure 1b  
 (b) Uncropped images for Figure 1e  
 (c) Uncropped images for Figure 2h

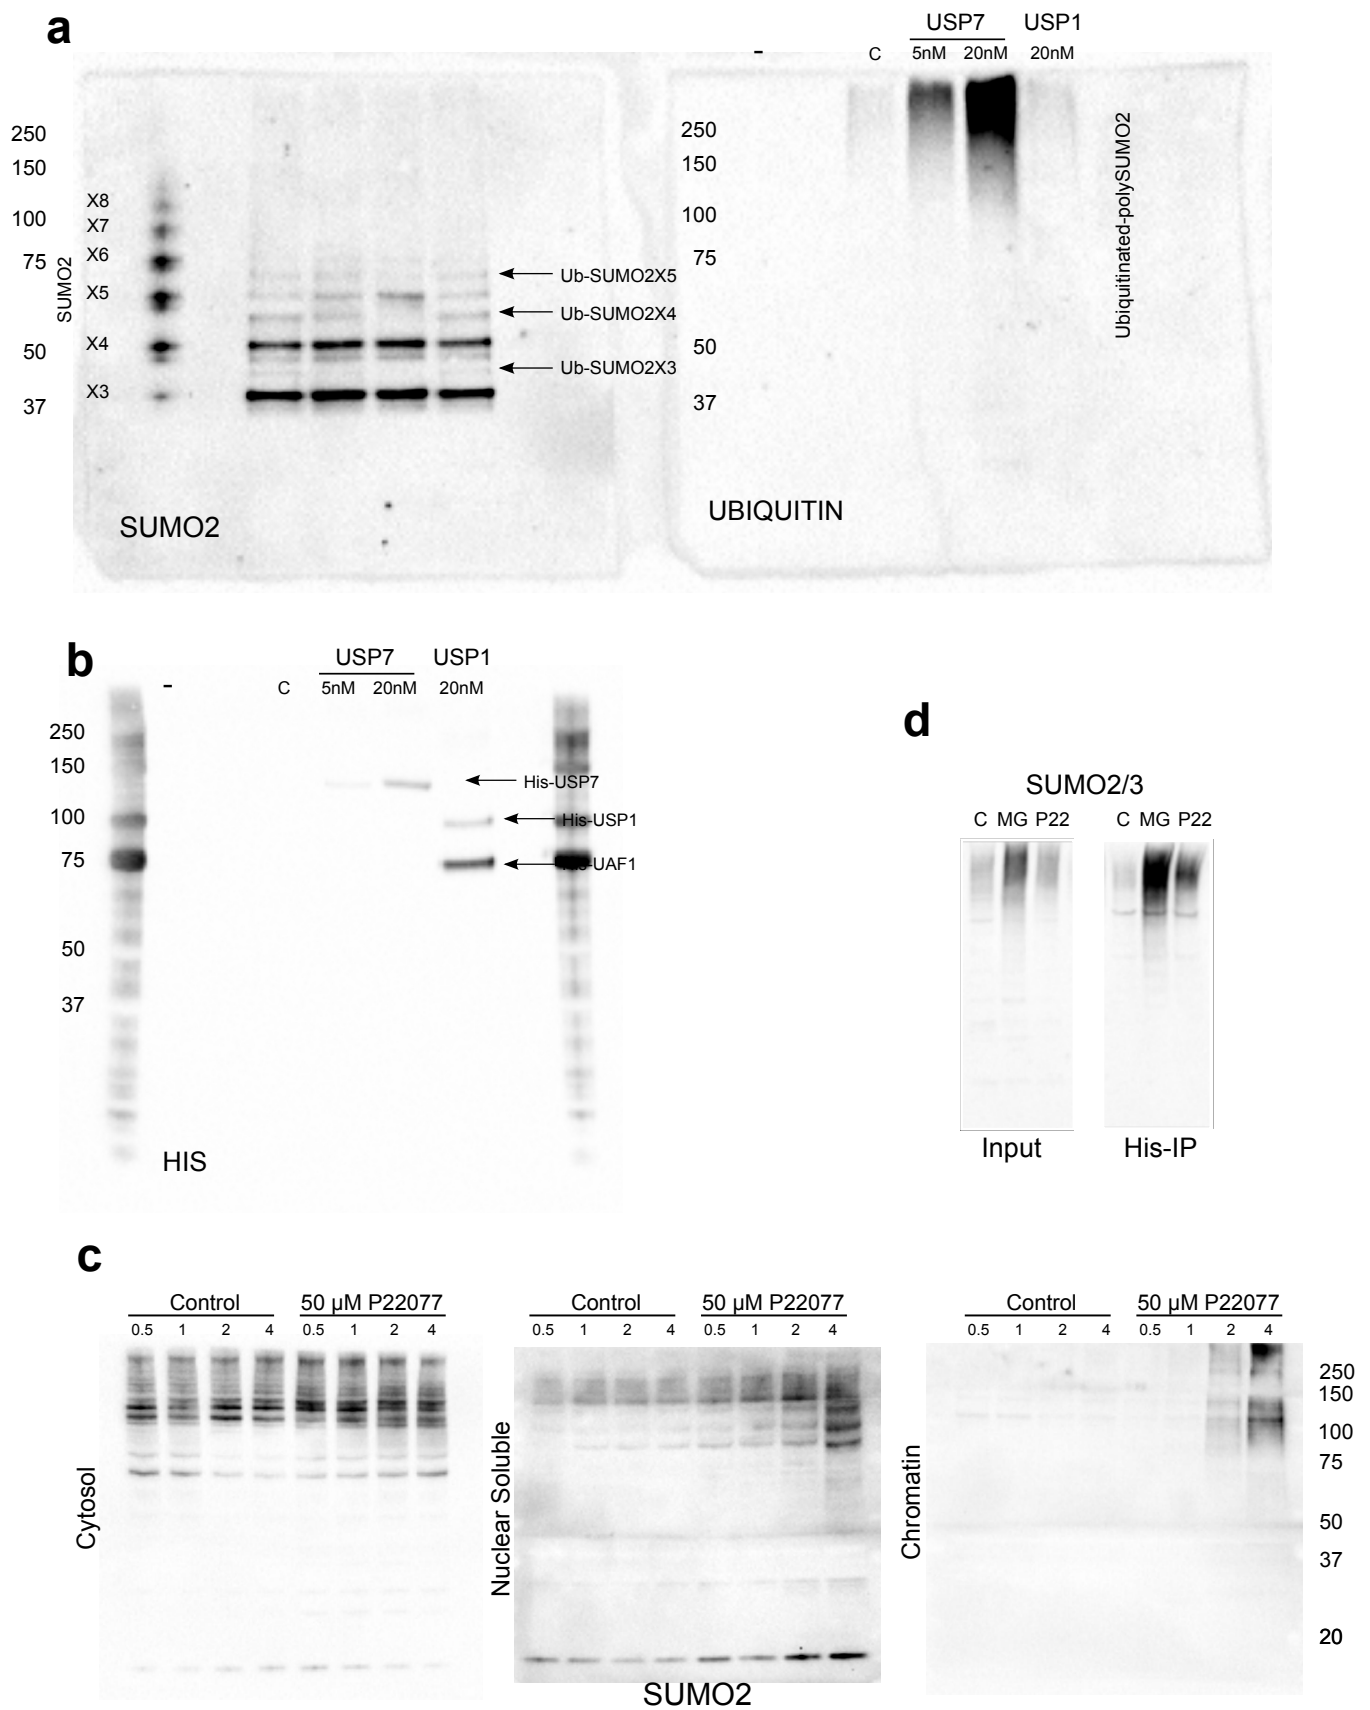

(a) Uncropped images for Figure 4b-c  
 (b) Uncropped images for Figure 4d  
 (c) Uncropped images for Figure 4f  
 (d) Uncropped images for Figure 4g

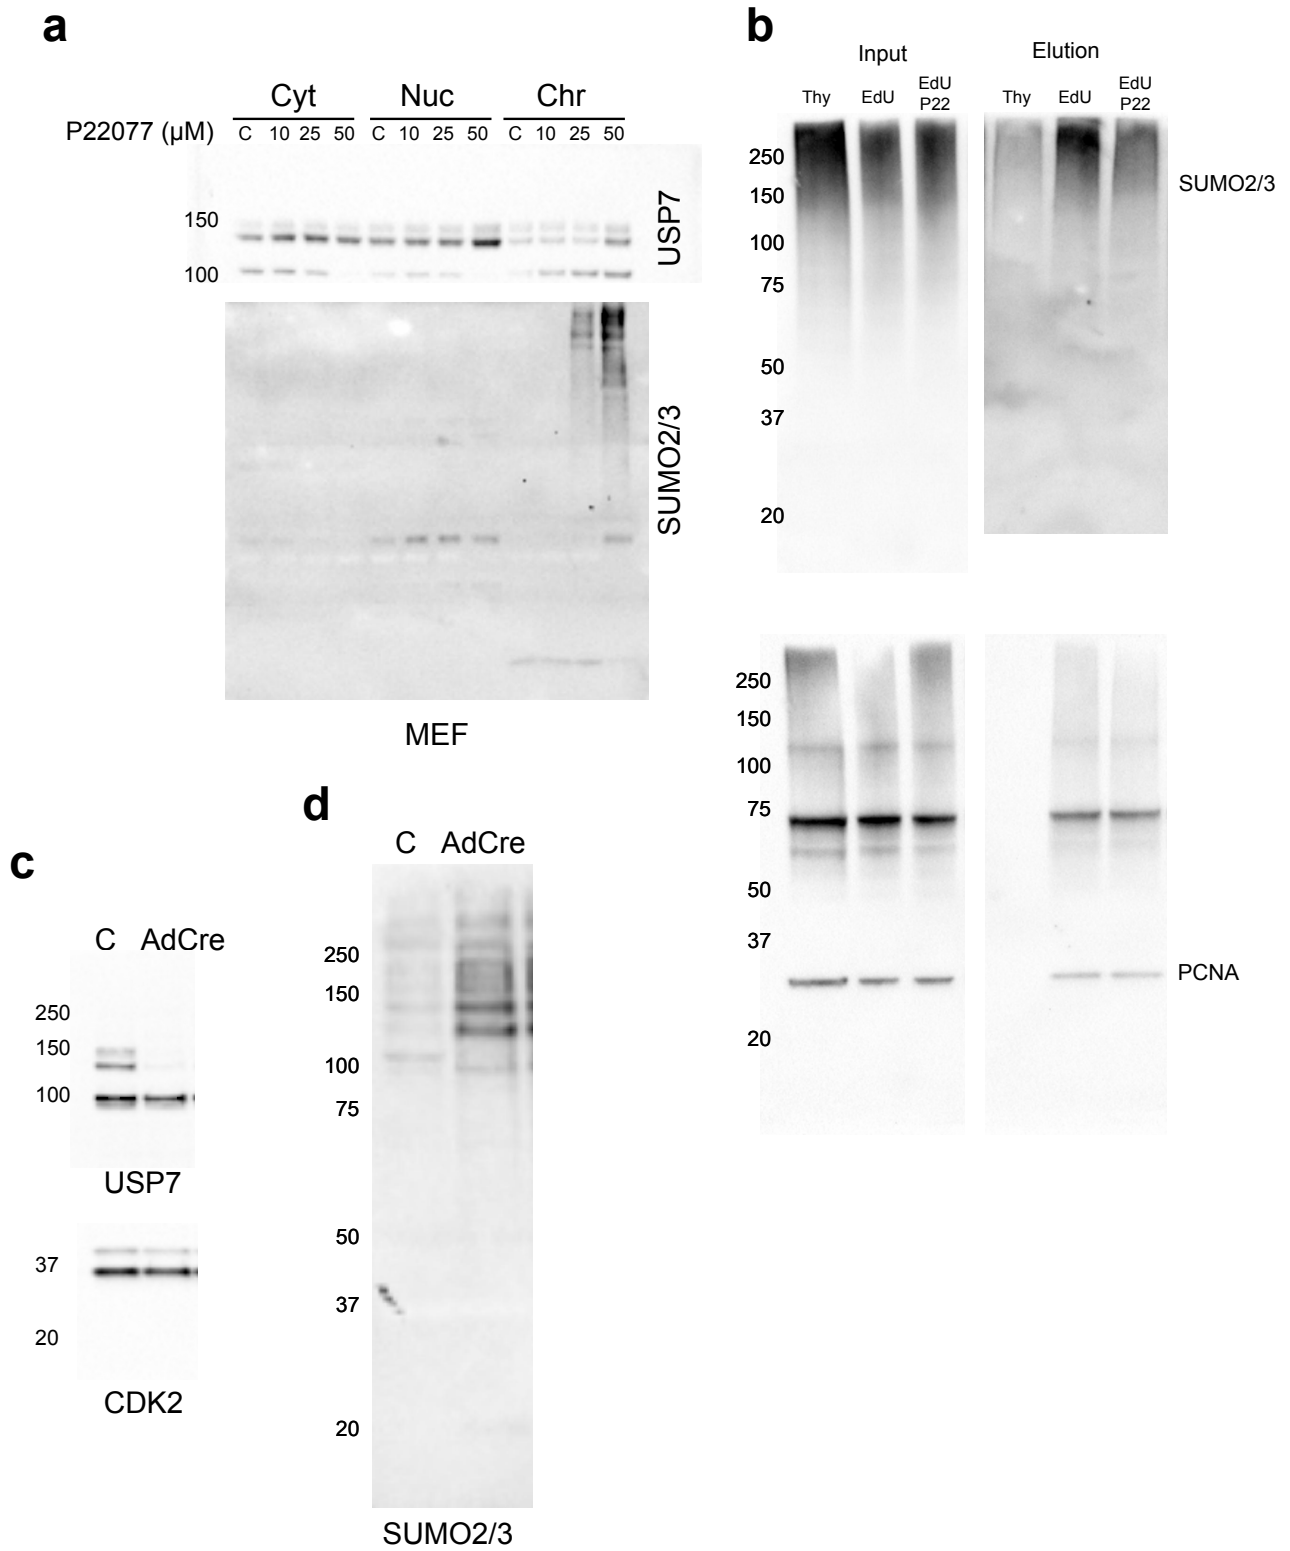

(a) Uncropped images for Figure 5a  
 (b) Uncropped images for Figure 5d  
 (c) Uncropped images for Figure 6a  
 (d) Uncropped images for Figure 6d
